# Supplementary material
Source: HighWire-hosted journal article supplement (https://jitc.bmj.com/content/8/1/e000462)
Supplement: inline-supplementary-material-3 [file inline-supplementary-material-3.xlsx]

## Sheet: Sheet1
Compound	Concentration (µM)	Norm. viability	RFP/GFP	Rank %
Fluphenazine dihydrochloride	81	0.0186598812553011	NA	0.210526315789474%
Indatraline hydrochloride	81	0.0427574171029668	NA	0.421052631578947%
Mefloquine hydrochloride	81	0.00508905852417303	NA	0.631578947368421%
Metixene hydrochloride	81	0.0322307039864292	NA	0.842105263157895%
Prenylamine lactate	81	0.0137526634899756	NA	1.05263157894737%
Prochlorperazine dimaleate	81	0.0229007633587786	NA	1.26315789473684%
Terfenadine	81	0.0179486801769912	NA	1.47368421052632%
Mitoxantrone dihydrochloride	27	0.00396650506831203	3.16086260571629	1.68421052631579%
Trifluoperazine dihydrochloride	81	0.0449533502968617	1.8233736871288	1.89473684210526%
Ethynodiol diacetate	27	0.816503800217155	1.79379562072859	2.10526315789474%
Methimazole	27	1.1129207383279	1.72180936869183	2.31578947368421%
Pepstatin A	27	0.9669457910974	1.65346386026976	2.52631578947368%
Ethynodiol diacetate	9	0.930909090909091	1.58006941252734	2.73684210526316%
Closantel	1	1.20430107526882	1.55574089153172	2.94736842105263%
Bromperidol	1	1.15412186379928	1.55371488392485	3.15789473684211%
Propafenone hydrochloride	1	1.21266427718041	1.54513457932746	3.36842105263158%
Bupivacaine hydrochloride	3	1.16533637400228	1.54179305470592	3.57894736842105%
Mebhydroline 1,5-naphtalenedisulfonate	3	1.30634739642721	1.54089814755747	3.78947368421053%
Methimazole	9	1.09818181818182	1.52344969691845	0.04
Thiostrepton	81	0.949957591178965	1.50756409082975	4.21052631578947%
Progesterone	27	0.915821947994711	1.49822949402186	4.42105263157895%
Glafenine hydrochloride	3	1.06290383884455	1.49733238660176	4.63157894736842%
Alprenolol hydrochloride	3	1.14006081337894	1.48553056189932	4.84210526315789%
Propidium iodide	1	1.36989247311828	1.44472089250033	5.05263157894737%
Pronethalol hydrochloride	1	1.42676224611708	1.41113757203189	5.26315789473684%
(S)-propranolol hydrochloride	1	1.22604540023895	1.4028108792618	5.47368421052632%
Diphenylpyraline hydrochloride	1	1.29295101553166	1.39930071170881	5.68421052631579%
Tropisetron HCl	1	1.05376344086022	1.37300742625877	5.89473684210526%
Piperacetazine	1	1.05710872162485	1.36531060767099	6.10526315789474%
Nafronyl oxalate	3	1.13740022805017	1.36527014737933	6.31578947368421%
Parbendazole	1	1.51541218637993	1.36515851072515	6.52631578947368%
Pentamidine isethionate	27	0.996742671009772	1.36465179646644	6.73684210526316%
Naftifine hydrochloride	27	0.915309446254072	1.35124154115067	6.94736842105263%
Meclozine dihydrochloride	1	0.998566308243728	1.34445708731064	7.1578947368421%
Trimipramine maleate salt	1	1.40501792114695	1.34095517580801	7.36842105263158%
Ethynodiol diacetate	81	0.746073298429319	1.33100968929565	7.57894736842105%
Progesterone	81	0.803223070398643	1.32076203325461	7.78947368421053%
Nylidrin	1	1.55388291517324	1.31161614339871	0.08
(-)-Epigallocatechin gallate	9	0.54978354978355	1.29355056358502	8.21052631578947%
Acitretin	81	0.949389179755672	1.29139471115367	8.42105263157895%
Diacerein	81	0.943280977312391	1.28619294735239	8.63157894736842%
Doxazosin mesylate	1	1.01027479091995	1.28042055492617	8.84210526315789%
Alverine citrate salt	3	1.02033447358419	1.27225467253148	9.05263157894737%
Diacerein	27	1.03474484256243	1.26566398573931	9.26315789473684%
Roxithromycin	1	0.983512544802867	1.26516121551677	9.47368421052632%
Desloratadine	3	1.28525641025641	1.25857908801165	9.68421052631579%
Antazoline hydrochloride	9	0.921249450065992	1.25701886189072	9.89473684210526%
Liranaftate	1	1.40836320191159	1.25509084337811	10.1052631578947%
Itopride	9	0.82534095908491	1.24772763990976	10.3157894736842%
Testosterone propionate	9	0.886933567971843	1.24387959464915	10.5263157894737%
Podophyllotoxin	81	0.791448516579407	1.24347046293608	10.7368421052632%
Adamantamine fumarate	9	1.00219973603168	1.23465463727355	10.9473684210526%
Ceftazidime pentahydrate	81	0.798982188295165	1.23337334750171	11.1578947368421%
Cefaclor hydrate	27	0.951079770824152	1.23101336685503	11.3684210526316%
Levopropoxyphene napsylate	3	1.21634615384615	1.23096024198133	11.5789473684211%
Hexachlorophene	1	1.35985663082437	1.2270326771053	11.7894736842105%
Ornidazole	81	0.821034775233249	1.22248970359309	0.12
Chloropyramine hydrochloride	1	1.33309438470729	1.21737675391661	12.2105263157895%
Ceftazidime pentahydrate	9	0.951165860096788	1.20204211447671	12.4210526315789%
Adamantamine fumarate	27	0.977523137946232	1.19984008147438	12.6315789473684%
Testosterone propionate	27	0.895548699867783	1.19628207312317	12.8421052631579%
Ketoconazole	27	0.795063904803878	1.19576391739941	13.0526315789474%
Nisoxetine hydrochloride	27	0.877307274701412	1.1952302457025	13.2631578947368%
Etoposide	27	0.855883649184663	1.19066169366881	13.4736842105263%
Roxithromycin	9	1.05226149752946	1.18522929407325	13.6842105263158%
Pizotifen malate	1	1.54719235364397	1.18086901636662	13.8947368421053%
Xylometazoline hydrochloride	1	0.90950744558992	1.17407693100826	14.1052631578947%
Ornidazole	27	1.06126046716615	1.17395318157433	14.3157894736842%
Ciclopirox ethanolamine	9	1.12181818181818	1.17230420394661	14.5263157894737%
Diphenidol hydrochloride	3	1.25313568985177	1.17030041588135	14.7368421052632%
Desloratadine	1	1.17252090800478	1.16984738098463	14.9473684210526%
Itraconazole	27	0.916395222584148	1.16876356530657	15.1578947368421%
Iobenguane sulfate	27	1.00749228735126	1.16586488534137	15.3684210526316%
Propidium iodide	3	1.41025641025641	1.16540254622058	15.5789473684211%
Stanozolol	9	1.04179498460185	1.16338130512498	15.7894736842105%
Reserpine	1	1.31469534050179	1.16295792707339	0.16
Haloperidol	3	0.96446218167997	1.16007871754744	16.2105263157895%
3p,5,7-Trihydroxy-3,4p-dimethoxyflavone	27	0.848325853753784	1.15255529173626	16.4210526315789%
Pepstatin A	81	0.725190839694656	1.15087205716234	16.6315789473684%
Idazoxan hydrochloride	27	0.728555917480999	1.14835114831369	16.8421052631579%
Stanozolol	81	0.726039016115352	1.14695349966456	17.0526315789474%
Roxithromycin	3	1.05448717948718	1.14686713490963	17.2631578947368%
Ibutilide fumarate	9	0.972727272727273	1.14526609691691	17.4736842105263%
Flunarizine dihydrochloride	3	0.98175598631699	1.14355990987223	17.6842105263158%
Idazoxan hydrochloride	9	1.02545454545455	1.14065573985491	17.8947368421053%
Drofenine hydrochloride	1	1.29127837514934	1.13945567971899	18.1052631578947%
Levopropoxyphene napsylate	1	1.18088410991637	1.13899216404727	18.3157894736842%
Pepstatin A	9	0.890453145622525	1.12804440099792	18.5263157894737%
Methimazole	81	1.01570680628272	1.12739606820695	18.7368421052632%
Azithromycin	1	1.24778972520908	1.127392297379	18.9473684210526%
Danazol	27	0.874394006170119	1.12118699118141	19.1578947368421%
Bupropion hydrochloride	3	1.25579627518054	1.11995758168658	19.3684210526316%
Xylometazoline hydrochloride	3	1.14272139870772	1.11676814632241	19.5789473684211%
Prazosin hydrochloride	1	1.12066905615293	1.11464353058321	19.7894736842105%
Hydroxyzine dihydrochloride	9	0.593795093795094	1.11402440367338	0.2
Spiramycin	1	1.46523297491039	1.11236022468303	20.2105263157895%
Mitotane	27	1.0499457111835	1.11113211521296	20.4210526315789%
Rifapentine	27	0.96253856324372	1.11105836279097	20.6315789473684%
Mephentermine hemisulfate	27	0.870792616720955	1.1100601212024	20.8421052631579%
Flunisolide	9	0.995454545454545	1.1085906208123	21.0526315789474%
Ornidazole	9	0.998680158380994	1.10634276675746	21.2631578947368%
Domperidone	27	1.14302920806986	1.10612353022651	21.4736842105263%
Mitoxantrone dihydrochloride	3	0.701947079380929	1.10517276656244	21.6842105263158%
Itopride	27	0.992507712648744	1.10468433471219	21.8947368421053%
Adamantamine fumarate	81	0.776081424936387	1.10386635777733	22.1052631578947%
Thiostrepton	27	1.0674305861613	1.10306115113429	22.3157894736842%
Tropisetron HCl	3	1.17788461538462	1.10091441017568	22.5263157894737%
Acitretin	9	0.912727272727273	1.0984171109054	22.7368421052632%
Fluoxetine hydrochloride	1	1.30800477897252	1.09598284951358	22.9473684210526%
Prednicarbate	27	1	1.09590771360775	23.1578947368421%
Clobetasol propionate	27	1.22801302931596	1.09418866082855	23.3684210526316%
Mirtazapine	9	1.00363636363636	1.09285434323937	23.5789473684211%
Itopride	81	0.779474130619169	1.09267026701939	23.7894736842105%
Danazol	81	0.766751484308736	1.09132595669659	0.24
Stanozolol	27	0.986337593653592	1.08430881357438	24.2105263157895%
Testosterone propionate	81	0.674300254452926	1.08292285425598	24.4210526315789%
(R)-Propranolol hydrochloride	1	1.30131421744325	1.07751083724525	24.6315789473684%
Mitotane	9	1.05181818181818	1.07655264831873	24.8421052631579%
Sertindole	3	1.18108974358974	1.07645819846047	25.0526315789474%
Butenafine Hydrochloride	9	0.98	1.07589399637512	25.2631578947368%
Mephentermine hemisulfate	9	1.01090909090909	1.0757422638121	25.4736842105263%
Sertindole	1	0.988530465949821	1.06843369690052	25.6842105263158%
Labetalol hydrochloride	27	1.05156456588806	1.06736524345869	25.8947368421053%
Piperacetazine	9	1.09083998479666	1.06733026790551	26.1052631578947%
Meclozine dihydrochloride	3	1.11057692307692	1.06727245463738	26.3157894736842%
Mephentermine hemisulfate	81	0.869109947643979	1.06502091564326	26.5263157894737%
Ceftazidime pentahydrate	27	0.966064345526664	1.06444714078948	26.7368421052632%
Prazosin hydrochloride	3	1.42307692307692	1.06418636742744	26.9473684210526%
Tyloxapol	27	0.781758957654723	1.06360428390114	27.1578947368421%
Daunorubicin hydrochloride	1	0.083377308707124	1.06339540618986	27.3684210526316%
Alendronate sodium	27	1.1085776330076	1.05792048963704	27.5789473684211%
Carbinoxamine maleate salt	9	1.02090909090909	1.05736271679669	27.7894736842105%
Azithromycin	3	1.36698717948718	1.0562580054202	0.28
Podophyllotoxin	27	0.729641693811075	1.05473751594001	28.2105263157895%
Mexiletine hydrochloride	3	0.980425693652604	1.05288864373278	28.4210526315789%
Diltiazem hydrochloride	27	1.05773468488321	1.05178165907328	28.6315789473684%
Eicosenoic acids	90	1.08682458689555	1.0496096510439	28.8421052631579%
Citalopram Hydrobromide	9	0.99	1.04423303172426	29.0526315789474%
Melengestrol acetate	81	0.927574171029668	1.04316593247648	29.2631578947368%
Myristoleic acid	30	0.989266605841472	1.03922221959977	29.4736842105263%
Buspirone hydrochloride	27	0.990228013029316	1.03682117878943	29.6842105263158%
Myristoleic acid	90	1.14975838880816	1.03445881595477	29.8947368421053%
Acitretin	27	0.984799131378936	1.03322386641307	30.1052631578947%
Domperidone	3	1.09749144811859	1.03275984598043	30.3157894736842%
3p,5,7-Trihydroxy-3,4p-dimethoxyflavone	9	0.396705146705147	1.03249843611997	30.5263157894737%
Gardenin A	81	1.20827690070717	1.02950981156223	30.7368421052632%
Gefitinib	1	1.1273596176822	1.02896110977021	30.9473684210526%
Clarithromycin	1	1.30967741935484	1.0241097980406	31.1578947368421%
Rifapentine	9	0.906291245050594	1.0239763933523	31.3684210526316%
Iobenguane sulfate	9	0.910690717113946	1.02258732919978	31.5789473684211%
Etoposide	9	0.919489661240651	1.02038183910197	31.7894736842105%
Podophyllotoxin	9	0.794545454545454	1.01812335059882	0.32
Acyclovir	27	0.939620978404583	1.01370525415665	32.2105263157895%
Dyclonine hydrochloride	27	1.00572939620978	1.01322881237614	32.4210526315789%
Acyclovir	81	0.751484308736217	1.01196873174127	32.6315789473684%
Gefitinib	3	1.30929487179487	1.00996603357983	32.8421052631579%
Sibutramine HCl	9	1.01099868015838	1.0089089681873	33.0526315789474%
Itraconazole	81	0.773123909249564	1.00749812859406	33.2631578947368%
Pentamidine isethionate	9	1.00454545454545	1.00520332403751	33.4736842105263%
Clobutinol hydrochloride	27	1.055090348171	1.004869337418	33.6842105263158%
Piperidolate hydrochloride	9	1.02363636363636	1.00177512198233	33.8947368421053%
Acyclovir	9	0.940607127144743	1.00105185184943	34.1052631578947%
Bromperidol	3	1.18108974358974	1.00073854508064	34.3157894736842%
02 DMSO	1	1	1	34.5263157894737%
Flunisolide	27	0.979370249728556	0.994320385542875	34.7368421052632%
Camylofine chlorhydrate	9	0.535233285233285	0.993215617354665	34.9473684210526%
Cefaclor hydrate	9	0.871095468543775	0.991717620295119	35.1578947368421%
Ketoconazole	9	0.970523537175539	0.988236940605846	35.3684210526316%
Ibutilide fumarate	27	0.917480998914224	0.986095305651763	35.5789473684211%
Melengestrol acetate	27	1.04560260586319	0.982385353412672	35.7894736842105%
Cinnarizine	9	0.952925648922129	0.972582850111887	0.36
Palmitate	30	0.945898241701303	0.971163270294387	36.2105263157895%
Flecainide acetate	9	1.09818181818182	0.96978394380131	36.4210526315789%
Clebopride maleate	9	1.0699516058073	0.969174055427457	36.6315789473684%
Buspirone hydrochloride	81	0.854275741710297	0.967476777240549	36.8421052631579%
Beclomethasone dipropionate	9	1.02	0.963132033488769	37.0526315789474%
Cefaclor hydrate	81	0.79050042408821	0.962729830375515	37.2631578947368%
Liranaftate	9	1.17198783732421	0.962565658301942	37.4736842105263%
Tyloxapol	9	0.940909090909091	0.961543916568241	37.6842105263158%
Piperidolate hydrochloride	27	0.870792616720956	0.961209578609702	37.8947368421053%
Dilazep dihydrochloride	3	1.16400608133789	0.960394206156015	38.1052631578947%
Oxymetazoline hydrochloride	1	0.924398625429553	0.959494135162731	38.3157894736842%
Dicyclomine hydrochloride	3	1.1054732041049	0.95916259721607	38.5263157894737%
Clobetasol propionate	9	0.966818181818182	0.95834918663403	38.7368421052632%
Flecainide acetate	27	1.06948968512486	0.957500313773465	38.9473684210526%
Reboxetine mesylate	9	0.583032708032708	0.955688257725944	39.1578947368421%
Pentamidine isethionate	81	0.971204188481675	0.954542217148566	39.3684210526316%
Fenofibrate	9	0.916855061542326	0.951854922522556	39.5789473684211%
Tropisetron HCl	9	1.0190041809198	0.951780999064294	39.7894736842105%
Guanabenz acetate	3	1.10414291144052	0.951702940065132	0.4
Doxazosin mesylate	3	1.30448717948718	0.950979649561891	40.2105263157895%
Dequalinium dichloride	27	1.06126046716615	0.950610707456783	40.4210526315789%
Itraconazole	9	0.942727272727273	0.940326406264332	40.6315789473684%
Progesterone	9	1.01715794104707	0.937506974649085	40.8421052631579%
Glafenine hydrochloride	81	1.11565739225314	0.937328802777278	41.0526315789474%
Rifapentine	81	0.689567430025445	0.937044186948415	41.2631578947368%
Dequalinium dichloride	81	0.916030534351145	0.933251572353623	41.4736842105263%
Esmolol hydrochloride	27	1	0.932116601959765	41.6842105263158%
Prednicarbate	9	1.05090909090909	0.931738198627235	41.8947368421053%
Diacerein	9	1.11181818181818	0.930912785486236	42.1052631578947%
Triclosan	9	1.08363636363636	0.930282441972064	42.3157894736842%
Thiostrepton	9	0.992520897492301	0.927647621388233	42.5263157894737%
Antazoline hydrochloride	27	0.970471573380344	0.925029948242193	42.7368421052632%
Trimipramine maleate salt	3	1.44711538461538	0.921788424368913	42.9473684210526%
Bupropion hydrochloride	81	1.16339334424441	0.919948268512115	43.1578947368421%
Parthenolide	81	0.453752181500873	0.918021986133952	43.3684210526316%
(R)-Propranolol hydrochloride	3	1.16826923076923	0.911275737596	43.578947368421%
Diphenylpyraline hydrochloride	9	1.16932725199544	0.910193585557764	43.7894736842105%
Danazol	9	1.07435107787066	0.909592732792092	0.44
Chlorhexidine	9	0.966124065112187	0.906758614914757	44.2105263157895%
Chlorhexidine	81	0.108566581849025	0.906045794901493	44.421052631579%
Alprenolol hydrochloride	1	0.879725085910653	0.904002164802907	44.6315789473684%
Benperidol	9	1.04960091220068	0.90169924140633	44.8421052631579%
Chlorotrianisene	27	1.07274701411509	0.900835669987013	45.0526315789474%
Ziprasidone Hydrochloride	27	1.03474484256243	0.900340304735442	45.2631578947368%
Gardenin A	9	0.538359788359788	0.898622503010353	45.4736842105263%
Mevastatin	27	1.06948968512486	0.897906113608028	45.6842105263158%
Mirtazapine	81	0.823734729493892	0.895875435049829	45.8947368421053%
Carbinoxamine maleate salt	27	0.877307274701411	0.895689185655331	46.1052631578947%
Buspirone hydrochloride	9	1.05272727272727	0.890412220521366	46.3157894736842%
Iobenguane sulfate	81	0.897370653095844	0.889274042784873	46.5263157894737%
Dyclonine hydrochloride	9	0.930928288605367	0.885391136039552	46.7368421052632%
2-Hydroxychalcone	27	0.880062725062556	0.884679052516384	46.9473684210526%
Verapamil hydrochloride	9	0.582311207311207	0.882918717581144	47.1578947368421%
Prazosin hydrochloride	9	1.04960091220068	0.88065330628447	47.3684210526316%
Mexiletine hydrochloride	81	1.04473540643753	0.878317168939173	47.5789473684211%
Gardenin A	27	1.07417593923676	0.876714594827896	47.7894736842105%
Nisoxetine hydrochloride	9	0.998181818181818	0.875847485128216	0.48
Parthenolide	9	0.940909090909091	0.874046837136667	48.2105263157895%
Alendronate sodium	9	0.974545454545454	0.873962179187743	48.4210526315789%
Haloperidol	1	0.950744558991982	0.873083658998405	48.6315789473684%
Sulbactam	81	0.796684118673647	0.869406201228776	48.8421052631579%
Dequalinium dichloride	9	1.06467223933128	0.868187768148776	49.0526315789474%
Formoterol fumarate	27	1.2128121606949	0.867537084373818	49.2631578947368%
Alverine citrate salt	1	0.899198167239404	0.866779973387656	49.4736842105263%
Pyrvinium pamoate	1	1.06045400238949	0.865501992576929	49.6842105263158%
Diperodon hydrochloride	9	1.04795424549054	0.863105989182038	49.8947368421053%
Biperiden hydrochloride	9	0.983721953365596	0.861328636532241	50.1052631578947%
(-)-Epigallocatechin gallate	27	1.15473443376593	0.860894682169149	50.3157894736842%
Naftifine hydrochloride	9	1.10090909090909	0.856972267854532	50.5263157894737%
Benztropine mesylate	1	1.08721624850657	0.855950370895612	50.7368421052632%
Esmolol hydrochloride	9	1.15272727272727	0.855523272920148	50.9473684210526%
Loxapine succinate	27	0.945791097399736	0.849989265232233	51.1578947368421%
Halcinonide	9	1.07363636363636	0.848973197771777	51.3684210526316%
Phenformin	900	0.911831626848692	0.848886193670901	51.5789473684211%
05 Ethanol average	30	1.17623593417362	0.846686113452481	51.7894736842105%
Clobutinol hydrochloride	9	0.952925648922129	0.843241604605517	0.52
Bromhexine hydrochloride	9	0.939090909090909	0.841363689007266	52.2105263157895%
Diltiazem hydrochloride	9	0.979322481302244	0.840438676451864	52.4210526315789%
Piperacetazine	3	1.33974358974359	0.837154679781518	52.6315789473684%
Oxybutynin chloride	9	0.906291245050594	0.837122427482258	52.8421052631579%
Escitalopram	9	0.586159211159211	0.834619945982777	53.0526315789474%
Bromhexine hydrochloride	27	1.01520086862106	0.834556617697409	53.2631578947368%
Halcinonide	27	0.920738327904452	0.832966881907648	53.4736842105263%
Eicosenoic acids	810	0.870335327048063	0.832438847106533	53.6842105263158%
Sulbactam	9	1.03090909090909	0.828331139379701	53.8947368421053%
Closantel	9	1.0190041809198	0.826052667664862	54.1052631578947%
Beclomethasone dipropionate	27	0.88056460369164	0.822860080542597	54.3157894736842%
(S)-propranolol hydrochloride	3	1.44230769230769	0.82271263190281	54.5263157894737%
Mianserine hydrochloride	1	0.791523482245132	0.822036582703104	54.7368421052632%
Formoterol fumarate	9	0.988181818181818	0.820338683213702	54.9473684210526%
Pirenperone	9	0.949406071271447	0.819851504267781	55.1578947368421%
Meclozine dihydrochloride	9	0.949828962371722	0.81770758129438	55.3684210526316%
Hexachlorophene	3	1.40224358974359	0.817511899296209	55.578947368421%
Clebopride maleate	27	1.00220361392684	0.81611771461783	55.7894736842105%
(-)-Epigallocatechin gallate	81	1.11304520126987	0.807721881133269	0.56
Citalopram Hydrobromide	27	0.892508143322476	0.806910068680067	56.2105263157895%
Parthenolide	27	0.815418023887079	0.806761628914314	56.421052631579%
Chlorotrianisene	9	1.08636363636364	0.806745002815759	56.6315789473684%
Clemizole hydrochloride	27	0.990744821507272	0.80590146603236	56.8421052631579%
Formoterol fumarate	81	0.920593368237347	0.805074981595657	57.0526315789474%
Guanabenz acetate	9	0.92690278824416	0.803733077685988	57.2631578947368%
Propafenone hydrochloride	3	1.28846153846154	0.801953140314588	57.4736842105263%
Flurandrenolide	27	0.992399565689468	0.801414863230856	57.6842105263158%
01 Co average	0	0.98947606042399	0.799405265703006	57.8947368421053%
Guanabenz acetate	1	0.832760595647194	0.799213069156891	58.1052631578947%
Melengestrol acetate	9	1.11090909090909	0.794289987465856	58.3157894736842%
Flurandrenolide	81	0.93717277486911	0.794138008325002	58.5263157894737%
Dihydroergotamine tartrate	9	0.518879268879269	0.793341965793726	58.7368421052632%
Labetalol hydrochloride	9	1.17113946326441	0.788096783310327	58.9473684210526%
Domperidone	1	0.920962199312715	0.786872612898592	59.1578947368421%
Flurandrenolide	9	1.07909090909091	0.786603999679151	59.3684210526316%
Loxapine succinate	9	0.91684997800264	0.786042172985341	59.5789473684211%
Mirtazapine	27	0.91313789359392	0.781580346319979	59.7894736842105%
Etoposide	81	0.797285835453774	0.781100778375504	0.6
3,7-Dihydroxy-3p,4p,5p-trimethoxyflavone	9	1.12117955822886	0.78076898919756	60.2105263157895%
Bupivacaine hydrochloride	81	1.10338243316967	0.779704230452642	60.4210526315789%
Vaccenic acid	30	1.03181495623965	0.778989068037832	60.6315789473684%
Bromhexine hydrochloride	81	1.05235602094241	0.774278253537355	60.8421052631579%
Pyrvinium pamoate	3	1.23557692307692	0.770811589503857	61.0526315789474%
Clobetasol propionate	81	0.848167539267016	0.765770231159852	61.2631578947368%
Tetracaïne hydrochloride	9	1.04454545454545	0.765400205436564	61.4736842105263%
Cinnarizine	27	1.0453944468929	0.764717775749215	61.6842105263158%
2-Hydroxychalcone	9	0.493085618085618	0.763585366250138	61.8947368421053%
Amcinonide	9	1.06272727272727	0.761068258937144	62.1052631578947%
Pirenperone	27	1.06126046716615	0.760498382266963	62.3157894736842%
Esmolol hydrochloride	81	0.932809773123909	0.760303182506075	62.5263157894737%
3,7-Dihydroxy-3p,4p,5p-trimethoxyflavone	27	1.24533504544994	0.755813737717151	62.7368421052632%
Clemizole hydrochloride	9	1.04355477342719	0.754329885491464	62.9473684210526%
Ziprasidone Hydrochloride	9	0.939090909090909	0.748200680242331	63.1578947368421%
Aripiprazole	9	1.00727272727273	0.747717803996114	63.3684210526316%
Butenafine Hydrochloride	27	1.0586319218241	0.737474885214644	63.5789473684211%
Flecainide acetate	81	0.982547993019197	0.737198560033162	63.7894736842105%
DO 897/99	9	0.545454545454545	0.736455498225533	0.64
Palmitate	90	1.0936065961545	0.734877239965397	64.2105263157895%
Nafronyl oxalate	9	1.02110022607385	0.727759627915527	64.4210526315789%
Fenofibrate	1	0.912943871706758	0.711069131724702	64.6315789473684%
Prednicarbate	81	0.974694589877836	0.703827350704299	64.8421052631579%
Eicosenoic acids	270	1.0301050924205	0.699172409815027	65.0526315789474%
Camylofine chlorhydrate	27	1.12925476005411	0.693976102544671	65.2631578947368%
Ciclopirox ethanolamine	27	1.04668838219327	0.691344590449931	65.4736842105263%
Idazoxan hydrochloride	81	0.836823734729494	0.690517857492435	65.6842105263158%
Flunisolide	81	1.01570680628272	0.687563548921576	65.8947368421053%
Chlorhexidine	27	0.736007051564566	0.681551003463051	66.1052631578947%
Reboxetine mesylate	27	1.26758004478794	0.672176731888428	66.3157894736842%
Ketoconazole	81	0.707379134860051	0.667121851106062	66.5263157894737%
Chlorpheniramine maleate	9	0.898869648869649	0.666921364857154	66.7368421052632%
Dosulepin hydrochloride	9	0.934447866256049	0.665241407647709	66.9473684210526%
Chlorpheniramine maleate	27	1.09892079733271	0.662332813183761	67.1578947368421%
3p,5,7-Trihydroxy-3,4p-dimethoxyflavone	81	0.832869596512861	0.661468496071971	67.3684210526316%
Mevastatin	9	1.11272727272727	0.659434240116008	67.5789473684211%
Beclomethasone dipropionate	81	1.0174520069808	0.657810608861026	67.7894736842105%
(R)-Propranolol hydrochloride	9	0.93652603572786	0.655913793298218	0.68
Sibutramine HCl	27	1.13706478624945	0.654160136038482	68.2105263157895%
Mesoridazine besylate	9	0.48454785954786	0.652896604733958	68.4210526315789%
Carbinoxamine maleate salt	81	0.921465968586388	0.651011447034349	68.6315789473684%
Labetalol hydrochloride	81	0.729431721798134	0.649281931205043	68.8421052631579%
Dirithromycin	9	0.967272727272727	0.649096578430434	69.0526315789474%
Nisoxetine hydrochloride	81	0.952006980802792	0.645259777101226	69.2631578947368%
Chloroquine diphosphate	9	0.503186628186628	0.641500940324297	69.4736842105263%
Clarithromycin	3	1.24038461538462	0.638451294054979	69.6842105263158%
Halcinonide	81	0.843804537521815	0.634373917561774	69.8947368421053%
Tetracaïne hydrochloride	27	0.966340933767644	0.633429924050553	70.1052631578947%
Chlorotrianisene	81	1.02792321116928	0.630409830333697	70.3157894736842%
Dimethisoquin hydrochloride	9	0.593855218855219	0.62697102810673	70.5263157894737%
Mitotane	81	0.99738219895288	0.626804561285692	70.7368421052632%
Prochlorperazine dimaleate	9	0.805983282006159	0.626046560053089	70.9473684210526%
Ibutilide fumarate	81	0.988656195462478	0.62347623261059	71.1578947368421%
Vaccenic acid	270	1.07141891663569	0.616613957451756	71.3684210526316%
Mevastatin	81	0.825479930191972	0.615398140702618	71.5789473684211%
Diltiazem hydrochloride	81	0.721798134011874	0.61000034168145	71.7894736842105%
Eicosenoic acids	30	1.35844738057423	0.608486180629464	0.72
Alendronate sodium	81	0.910122164048866	0.589636407599911	72.2105263157895%
Cyclosporin A	27	0.896430145438519	0.586418557040359	72.421052631579%
Pirenperone	81	0.932994062765055	0.585827224611224	72.6315789473684%
Amcinonide	27	1.03908794788274	0.585052886832037	72.8421052631579%
Diperodon hydrochloride	27	0.929925077126487	0.58419002112653	73.0526315789474%
Fenofibrate	81	0.973813420621931	0.582649881676423	73.2631578947368%
Vaccenic acid	810	0.920019373951047	0.580294620734346	73.4736842105263%
Triclosan	27	1.12269272529859	0.576697537470675	73.6842105263158%
Oxybutynin chloride	27	1.07536359629793	0.568808397700476	73.8947368421053%
Benztropine mesylate	9	0.931204865070315	0.55657509649821	74.1052631578947%
Palmitate	270	1.10550242737584	0.556191377116672	74.3157894736842%
3,7-Dihydroxy-3p,4p,5p-trimethoxyflavone	81	1.37419997972493	0.554670061872553	74.5263157894737%
Biperiden hydrochloride	27	1.1088585279859	0.553667081209744	74.7368421052632%
Spiperone	9	0.95468543774747	0.55277963342716	74.9473684210526%
Hydroxyzine dihydrochloride	27	1.10890868616181	0.544134113593606	75.1578947368421%
Tetracaïne hydrochloride	81	0.869982547993019	0.541178798669708	75.3684210526316%
Antazoline hydrochloride	81	0.726887192536047	0.536593364940056	75.5789473684211%
Clebopride maleate	81	0.68871925360475	0.536215050095862	75.7894736842105%
Verapamil hydrochloride	27	1.12266134965179	0.525791284719041	0.76
Vaccenic acid	90	1.29024769371135	0.520300467318006	76.2105263157895%
Alprenolol hydrochloride	81	1.04337152209493	0.515969694643311	76.4210526315789%
Myristoleic acid	270	1.06397684137014	0.509813921590784	76.6315789473684%
Amphotericin B	3	1.30634739642721	0.500684510773987	76.8421052631579%
Butenafine Hydrochloride	81	0.943280977312391	0.500340540093409	77.0526315789474%
Clobutinol hydrochloride	81	0.843087362171332	0.492061646706449	77.2631578947368%
Amodiaquin dihydrochloride dihydrate	9	1.07083150021997	0.465700092034786	77.4736842105263%
Piperidolate hydrochloride	81	0.854275741710297	0.464203028834465	77.6842105263158%
Amitryptiline hydrochloride	9	0.930048394192697	0.46406677418443	77.8947368421053%
Cyclosporin A	9	0.923009238891333	0.45625293236908	78.1052631578947%
Fluphenazine dihydrochloride	9	1.0849098108227	0.453778720951016	78.3157894736842%
Benperidol	81	0.839677047289504	0.448420385784694	78.5263157894737%
Spiperone	27	0.81445570736007	0.445333481945333	78.7368421052632%
Myristoleic acid	810	1.20415413555007	0.444078893087321	78.9473684210526%
Phenformin	2700	0.927758816837315	0.44221137577279	79.1578947368421%
Escitalopram	27	1.11782699078274	0.442086765654059	79.3684210526316%
Aripiprazole	27	0.931596091205212	0.436659862131149	79.5789473684211%
Clemizole hydrochloride	81	0.80746395250212	0.427094924119268	79.7894736842105%
Palmitate	810	0.917109902116492	0.425503581845998	0.8
Trifluoperazine dihydrochloride	9	0.900131984161901	0.419580995111274	80.2105263157895%
Amcinonide	81	0.976439790575916	0.41414072071253	80.4210526315789%
Astemizole	81	0.0466824548040737	0.409026012626101	80.6315789473684%
Dyclonine hydrochloride	81	0.776081424936387	0.401343015160962	80.8421052631579%
Indatraline hydrochloride	9	0.908181818181818	0.396788706859092	81.0526315789474%
Spiperone	81	0.775233248515691	0.386206481021031	81.2631578947368%
Loxapine succinate	81	0.734520780322307	0.384830033577552	81.4736842105263%
Imatinib	9	1.19327251995439	0.382541877226528	81.6842105263158%
Dimethisoquin hydrochloride	27	1.15713875970403	0.381531786350468	81.8947368421053%
Camylofine chlorhydrate	81	1.2003429717226	0.378892045045206	82.1052631578947%
Amitryptiline hydrochloride	27	1.08505949757602	0.377874782504861	82.3157894736842%
Chlorpheniramine maleate	81	1.06786212848702	0.369584484661853	82.5263157894737%
Dosulepin hydrochloride	27	1.00308505949758	0.365209007428351	82.7368421052632%
Terfenadine	27	0.0615841342216977	0.36057676796759	82.9473684210526%
Norcyclobenzaprine	9	0.611892736892737	0.357104828392145	83.1578947368421%
Dextromethorphan hydrobromide monohydrate	81	1.19612656846699	0.352175422004422	83.3684210526316%
Citalopram Hydrobromide	81	0.87260034904014	0.351122345105131	83.5789473684211%
Metixene hydrochloride	9	0.814782226132864	0.335423224062486	83.7894736842105%
DO 897/99	27	1.00129603681935	0.332505115259526	0.84
Thioproperazine dimesylate	9	0.538840788840789	0.332254101746873	84.2105263157895%
Dihydroergotamine tartrate	27	1.08627324569271	0.330120361880647	84.421052631579%
Amlodipine	9	1.04971403431588	0.323730640171726	84.6315789473684%
Naftifine hydrochloride	81	0.910122164048866	0.307681957509992	84.8421052631579%
Reboxetine mesylate	81	1.01206553376816	0.297214811618414	85.0526315789474%
Biperiden hydrochloride	81	0.815945716709075	0.296053097965145	85.2631578947368%
Cyclosporin A	81	0.801526717557252	0.29247745315907	85.4736842105263%
Hydroxychloroquine sulfate	9	0.586580086580087	0.292406035074325	85.6842105263158%
Dirithromycin	27	0.932681867535288	0.281609066822793	85.8947368421053%
Doxazosin mesylate	27	1.08308507116849	0.280824871486828	86.1052631578947%
Trifluoperazine dihydrochloride	27	0.0625826355222565	0.276097776353087	86.3157894736842%
Sibutramine HCl	81	0.731976251060221	0.272870473592205	86.5263157894737%
Diperodon hydrochloride	81	0.893129770992366	0.272681831359673	86.7368421052632%
Mebeverine hydrochloride	81	1.09247135842881	0.268878213326236	86.9473684210526%
Nafronyl oxalate	81	0.965630114566285	0.265599627201335	87.1578947368421%
Oxybutynin chloride	81	0.703138252756573	0.260585007635627	87.3684210526316%
Amodiaquin dihydrochloride dihydrate	27	1.02512119876598	0.259668857349552	87.5789473684211%
Daunorubicin hydrochloride	3	0.00449326010983525	0.258869600715221	87.7894736842105%
Prenylamine lactate	9	0.546717171717172	0.258278050317851	0.88
Mefloquine hydrochloride	9	0.887813462384514	0.257421974154946	88.2105263157895%
(S)-propranolol hydrochloride	81	1.20184544405998	0.25288545089827	88.4210526315789%
2-Hydroxychalcone	81	0.644000608880235	0.251653526979239	88.6315789473684%
Fluphenazine dihydrochloride	27	0.45482591449978	0.247672060385839	88.8421052631579%
Astemizole	9	0.574254449254449	0.239579362013963	89.0526315789474%
Mebhydroline 1,5-naphtalenedisulfonate	81	0.927441352973268	0.238823358206406	89.2631578947368%
Escitalopram	81	1.18528242886601	0.22919802293887	89.4736842105263%
Prochlorperazine dimaleate	27	0.212428382547378	0.228190402512949	89.6842105263158%
Amlodipine	27	0.391361833406787	0.226236515062108	89.8947368421053%
Mefloquine hydrochloride	27	0.101366240634641	0.215933347711076	90.1052631578947%
Hydroxyzine dihydrochloride	81	0.934591011853234	0.206500343831271	90.3157894736842%
Mesoridazine besylate	27	1.20321984418096	0.204204555297422	90.5263157894737%
Cinnarizine	81	0.79813401187447	0.204050082180814	90.7368421052632%
Indatraline hydrochloride	27	0.0749185667752443	0.199074433371156	90.9473684210526%
Monensin sodium salt	9	1.12409730140631	0.191169973034056	91.1578947368421%
Amitryptiline hydrochloride	81	0.598812553011026	0.190831820825094	91.3684210526316%
Ziprasidone Hydrochloride	81	0.12739965095986	0.188831098753918	91.5789473684211%
Alverine citrate salt	81	1.04064375340971	0.183998158788576	91.7894736842105%
Aripiprazole	81	0.211169284467714	0.18305655037299	0.92
Phenformin	8100	0.488433826317785	0.176394505963824	92.2105263157895%
Verapamil hydrochloride	81	1.17883661704062	0.173710391747725	92.4210526315789%
Metixene hydrochloride	27	0.589687086822389	0.170159293103608	92.6315789473684%
Chloroquine diphosphate	27	1.25172085209727	0.169233624400955	92.8421052631579%
Tyloxapol	81	0.908376963350785	0.165380021975887	93.0526315789474%
Dosulepin hydrochloride	81	0.52078032230704	0.164456640795838	93.2631578947368%
Triclosan	81	0.932809773123909	0.162868633297167	93.4736842105263%
Ciclopirox ethanolamine	81	0.791448516579407	0.161516507676586	93.6842105263158%
Amodiaquin dihydrochloride dihydrate	81	0.603901611535199	0.14618011424105	93.8947368421053%
Terfenadine	9	0.577080327080327	0.141674503541812	94.1052631578947%
Mesoridazine besylate	81	0.828318881093027	0.139757305947869	94.3157894736842%
Dicyclomine hydrochloride	81	0.876977632296781	0.127774440652805	94.5263157894737%
Chloroquine diphosphate	81	1.22175862982306	0.126262705565369	94.7368421052632%
Hydroxychloroquine sulfate	27	1.20764982338718	0.125356245525334	94.9473684210526%
Imatinib	27	1.1837140019861	0.123135786765641	95.1578947368421%
Haloperidol	81	0.62329514457174	0.120893160418693	95.3684210526316%
Norcyclobenzaprine	27	0.967393134730927	0.118794544548856	95.5789473684211%
Thioproperazine dimesylate	81	0.0425502723352608	0.11789449388867	95.7894736842105%
Thioproperazine dimesylate	27	0.802859137521725	0.117676746316507	0.96
Closantel	81	0.794694348327566	0.114594299279634	96.2105263157895%
Niclosamide	9	0.915599095704597	0.113587900649065	96.4210526315789%
Dilazep dihydrochloride	81	1.04200763775232	0.105826968904655	96.6315789473684%
Dirithromycin	81	0.829842931937173	0.103268166361636	96.8421052631579%
Dimethisoquin hydrochloride	81	0.705313808727842	0.0988916892524326	97.0526315789474%
Hydroxychloroquine sulfate	81	0.934335674980424	0.0890056196875316	97.2631578947368%
DO 897/99	81	0.74955207731277	0.0816628405956208	97.4736842105263%
Prenylamine lactate	27	0.379060007920065	0.0793888769559924	97.6842105263158%
Amlodipine	81	0.0356234096692112	0.0752271550660913	97.8947368421053%
04 BafA average	0.1	0.949943581411384	0.0701363195464038	98.1052631578947%
Astemizole	27	1.00270472225905	0.0696151105574433	98.3157894736842%
Mitoxantrone dihydrochloride	9	0.021997360316762	0.0643551704714074	98.5263157894737%
Dihydroergotamine tartrate	81	1.0235372071172	0.0638727371656786	98.7368421052632%
Monensin sodium salt	27	1.02615028136379	0.0537868384305557	98.9473684210526%
Imatinib	81	0.965397923875433	0.0523299519704119	99.1578947368421%
Niclosamide	81	0.966993998908892	0.0458769671880727	99.3684210526316%
Niclosamide	27	0.970791930141524	0.0429008933631318	99.5789473684211%
Monensin sodium salt	81	0.867358708189158	0.03978415038508	99.7894736842105%
Norcyclobenzaprine	81	0.03990187438639	0.029466632929702	1
